# Supplementary material for: Relationship between Vegetation Habitats and Bird Communities in Urban Mountain Parks
Source: MDPI journal article supplement (doi:10.3390/ani12182470), 2022-09-19
Supplement: s1 [file s1]

**Table S1.** Five vegetation habitats and 11 vegetation variables in urban mountain parks in Fuzhou, China.

| Variables | Vegetation habitats |               |              |             |            |
|-----------|---------------------|---------------|--------------|-------------|------------|
|           | Waterfront          | Sparse forest | Dense forest | Shrub       | Grassland  |
| DIVt      | 1.34±0.27           | 2.30±0.19     | 2.36±0.13    | 1.36±0.43   | 1.30±0.31  |
| DIVs      | 1.12±0.60           | 0.80±0.45     | 1.20±0.27    | 1.30±0.27   | 0.52±0.42  |
| RICt      | 2.80±0.40           | 4.60±0.63     | 5.40±0.49    | 2.80±0.75   | 2.50±0.49  |
| RICs      | 2.40±0.80           | 2.06±0.63     | 2.12±0.35    | 2.60±0.49   | 1.50±0.80  |
| RICg      | 1.60±0.43           | 1.43±0.55     | 1.80±0.32    | 1.54±0.40   | 1.67±0.49  |
| COVt      | 22.97±6.26          | 53.47±11.73   | 83.32±4.83   | 19.49±5.49  | 18.58±5.53 |
| COVs      | 26.15±13.41         | 23.97±4.43    | 45.39±17.32  | 67.62±12.90 | 21.00±9.20 |
| COVg      | 74.95±20.91         | 85.25±7.67    | 77.56±7.30   | 75.45±10.02 | 92.85±5.76 |
| ABUt      | 4.40±0.49           | 6.00±1.10     | 9.60±1.80    | 3.60±0.80   | 3.20±0.40  |
| MAX_HEIt  | 6.70±1.02           | 7.42±0.70     | 10.74±2.22   | 5.62±1.11   | 5.26±0.91  |
| AVE_HBt   | 2.06±0.89           | 4.03±0.71     | 6.50±1.16    | 2.13±0.43   | 1.72±0.56  |
| AVE_HEIs  | 0.68±0.07           | 0.85±0.26     | 0.79±0.23    | 0.73±0.25   | 0.66±0.16  |
| AVE_DBH   | 0.24±0.04           | 0.29±0.03     | 0.36±0.05    | 0.33±0.05   | 0.31±0.04  |
| AVE_HEIt  | 5.00±1.31           | 5.41±0.43     | 8.77±1.25    | 5.07±0.86   | 4.33±0.76  |

(1) DIVt, diversity of tree layer; (2) DIVs, Diversity of shrub layer; (3) RICt, richness of tree layer; (4) RICs, richness of shrub layer; (5) RICg, richness of ground cover; (6) COVt, coverage of tree layer; (7) COVs, coverage of shrub layer; (8) COVg, coverage of ground cover; (9) ABUt, abundance of trees; (10) MAX\_HEIt, maximum tree height; (11) AVE\_HBt, average branch height under trees; (12) AVE\_HEIs, average shrub heights; (13) AVE\_DBH, average tree diameter at breast height; (14) AVE\_HEIt, average tree height;

**Table S2.** Bird list of urban mountain parks and the locations where the birds were observed in Fuzhou, China. LC, least concern; NT, near threatened; VU, vulnerable; PP, Pingshan Park; FCP, Fushan Country Park; NMP, Niugang Mountain Park; MMP, Meifeng Mountain Park; FMP, Feifeng Mountain Park;

| No. | Species name              | Scientific name                | Order         | Family      | Genus               | Resident type  | IUCN Red<br>List of<br>Threatened<br>Species | Observed<br>locations |
|-----|---------------------------|--------------------------------|---------------|-------------|---------------------|----------------|----------------------------------------------|-----------------------|
| 1   | Pied Kingfisher           | <i>Ceryle rudis</i>            | Coraciiformes | Alcedinidae | <i>Ceryle</i>       | resident       | LC                                           | FCP                   |
| 2   | White-throated Kingfisher | <i>Halcyon smyrnensis</i>      | Coraciiformes | Alcedinidae | <i>Halcyon</i>      | resident       | LC                                           | FCP                   |
| 3   | Collared Dove             | <i>Streptopelia decaocto</i>   | Columbiformes | Columbidae  | <i>Streptopelia</i> | resident       | LC                                           | PP                    |
| 4   | Oriental Turtle Dove      | <i>Streptopelia orientalis</i> | Columbiformes | Columbidae  | <i>Streptopelia</i> | resident       | LC                                           | PP NMP MMP<br>FMP FCP |
| 5   | Spotted Dove              | <i>Spilopelia chinensis</i>    | Columbiformes | Columbidae  | <i>Spilopelia</i>   | resident       | LC                                           | PP NMP MMP<br>FMP FCP |
| 6   | Common Moorhen            | <i>Gallinula chloropus</i>     | Gruiformes    | Rallidae    | <i>Gallinula</i>    | resident       | LC                                           | PP NMP FMP            |
| 7   | White-breasted Waterhen   | <i>Amauornis phoenicurus</i>   | Gruiformes    | Rallidae    | <i>Amauornis</i>    | resident       | LC                                           | PP MMP FMP<br>FCP     |
| 8   | Watercock                 | <i>Gallicrex cinerea</i>       | Gruiformes    | Rallidae    | <i>Gallicrex</i>    | summer visitor | LC                                           | MMP                   |
| 9   | Silver Pheasant           | <i>Lophura nycthemera</i>      | Galliformes   | Phasianidae | <i>Lophura</i>      | resident       | LC                                           | MMP                   |
| 10  | Chinese Bamboo Partridge  | <i>Bambusicola thoracicus</i>  | Galliformes   | Phasianidae | <i>Bambusicola</i>  | resident       | LC                                           | MMP                   |
| 11  | Plaintive Cuckoo          | <i>Cacomantis merulinus</i>    | Cuculiformes  | Cuculidae   | <i>Cacomantis</i>   | summer visitor | LC                                           | PP NMP MMP<br>FMP FCP |
| 12  | Cuckoo                    | <i>Cuculus canorus bakeri</i>  | Cuculiformes  | Cuculidae   | <i>Cuculus</i>      | summer visitor | LC                                           | PP FMP FCP            |
| 13  | Greater Coucal            | <i>Centropus sinensis</i>      | Cuculiformes  | Cuculidae   | <i>Centropus</i>    | resident       | LC                                           | PP MMP FCP            |

|    |                                 |                             |               |                    |                       |                 |    |                       |
|----|---------------------------------|-----------------------------|---------------|--------------------|-----------------------|-----------------|----|-----------------------|
| 14 | Indian Cuckoo                   | Cuculus<br>micropterus      | Cuculiformes  | Cuculidae          | Cuculus               | summer visitor  | LC | PP                    |
| 15 | Asian Koel                      | Eudynamys<br>scolopaceus    | Cuculiformes  | Cuculidae          | Eudynamys             | summer visitor  | LC | FCP                   |
| 16 | Himalayan Cuckoo                | Cuculus<br>saturatus        | Cuculiformes  | Cuculidae          | Cuculus               | summer visitor  | LC | PP                    |
| 17 | Collared Crow                   | Corvus torquatus            | Passeriformes | Corvidae           | Corvus                | resident        | VU | FCP                   |
| 18 | Japanese Paradise<br>Flycatcher | Terpsiphone<br>atrocaudata  | Passeriformes | Monarchidae        | Terpsiphone           | passing migrant | NT | PP                    |
| 19 | Japanese White-eye              | Zosterops<br>japonicus      | Passeriformes | Zosteropidae       | Zosterops             | resident        | LC | PP NMP MMP<br>FMP FCP |
| 20 | Crested Myna                    | Acridotheres<br>crisatellus | Passeriformes | Sturnidae          | Acridotheres          | resident        | LC | PP NMP MMP<br>FMP FCP |
| 21 | Pale Thrush                     | Turdus pallidus             | Passeriformes | Turdidae           | Turdus                | winter visitor  | LC | FMP FCP               |
| 22 | Sooty-headed Bulbul             | Pycnonotus<br>aurigaster    | Passeriformes | Pycnonotidae       | Pycnonotus<br>jocosus | resident        | LC | PP MMP                |
| 23 | White Wagtail                   | Motacilla alba              | Passeriformes | Motacillidae       | Motacilla             | resident        | LC | PP MMP FMP<br>FCP     |
| 24 | White-browed<br>Laughingthrush  | Garrulax sannio             | Passeriformes | Leiothrichida<br>e | Garrulax              | resident        | LC | MMP FCP               |
| 25 | White-spectacled<br>Warbler     | Seicercus affinis           | Passeriformes | Phylloscopid<br>ae | Seicercus             | winter visitor  | LC | PP                    |
| 26 | Eyebrowed Thrush                | Turdus obscurus             | Passeriformes | Turdidae           | Turdus                | passing migrant | LC | FMP FCP               |
| 27 | Tristram's Bunting              | Emberiza<br>tristrami       | Passeriformes | Emberiza           | Emberiza              | winter visitor  | LC | PP NMP FMP<br>FCP     |
| 28 | Chinese Bulbul                  | Pycnonotus<br>sinensis      | Passeriformes | Pycnonotidae       | Pycnonotus<br>jocosus | resident        | LC | PP NMP MMP<br>FMP FCP |
| 29 | White-rumped Munia              | Lonchura striata            | Passeriformes | Passeridae         | Lonchura              | resident        | LC | FMP                   |
| 30 | Scaly-breasted Munia            | Lonchura<br>punctulata      | Passeriformes | Passeridae         | Lonchura              | resident        | LC | FCP                   |

|    |                         |                          |               |                |                    |                 |    |                    |
|----|-------------------------|--------------------------|---------------|----------------|--------------------|-----------------|----|--------------------|
| 31 | Daurian Redstart        | Phoenicurus aureus       | Passeriformes | Muscicapidae   | Phoenicurus        | winter visitor  | LC | PP NMP FCP         |
| 32 | Fork-tailed Sunbird     | Aethopyga christinae     | Passeriformes | Nectariniidae  | Aethopyga          | resident        | LC | FCP                |
| 33 | Orange-bellied Leafbird | Chloropsis hardwickii    | Passeriformes | Chloropseidae  | Chloropsis         | resident        | LC | FCP                |
| 34 | Scarlet Minivet         | Pericrocotus speciosus   | Passeriformes | Passeriformes  | Pericrocotus       | resident        | LC | PP FMP FCP         |
| 35 | Plain Prinia            | Prinia inornata          | Passeriformes | Cisticolidae   | Cisticola          | resident        | LC | PP NMP MMP FMP FCP |
| 36 | Large-billed Crow       | Corvus macrorhynchos     | Passeriformes | Corvidae       | Corvus             | resident        | LC | NMP                |
| 37 | Dusky Fulvetta          | Alcippe brunnea          | Passeriformes | Pellorneidae   | Schoeniparus       | resident        | LC | PP                 |
| 38 | Black Bulbul            | Hypsipetes leucocephalus | Passeriformes | Pycnonotidae   | Hypsipetes         | resident        | LC | PP NMP MMP FMP     |
| 39 | Black Drongo            | Dicrurus macrocercus     | Passeriformes | Dicruridae     | Dicrurus           | summer visitor  | LC | PP                 |
| 40 | Masked Laughingthrush   | Garrulax perspicillatus  | Passeriformes | Leiothrichidae | Garrulax           | resident        | LC | NMP MMP FMP FCP    |
| 41 | Black-collared Starling | Gracupica nigricollis    | Passeriformes | Sturnidae      | Sturnus            | resident        | LC | NMP MMP FCP        |
| 42 | Chinese Grosbeak        | Eophona migratoria       | Passeriformes | Fringillidae   | Eophona            | winter visitor  | LC | PP MMP FMP         |
| 43 | Black-naped Oriole      | Oriolus chinensis        | Passeriformes | Oriolidae      | Oriolus            | summer visitor  | LC | PP NMP FCP         |
| 44 | Red-whiskered Bulbul    | Pycnonotus jocosus       | Passeriformes | Pycnonotidae   | Pycnonotus jocosus | resident        | LC | PP NMP MMP FMP FCP |
| 45 | Siberian Rubythroat     | Turdinae                 | Passeriformes | Muscicapidae   | Luscinia           | passing migrant | LC | PP                 |
| 46 | Rufous-capped Babbler   | Stachyridopsis ruficeps  | Passeriformes | Timaliidae     | Stachyris          | resident        | LC | FMP FCP            |

|    |                            |                            |               |                    |              |                 |    |                       |
|----|----------------------------|----------------------------|---------------|--------------------|--------------|-----------------|----|-----------------------|
| 47 | Black-throated Bushtit     | Aegithalos<br>concinus     | Passeriformes | Aegithalidae       | Aegithalos   | resident        | LC | PP NMP MMP<br>FMP FCP |
| 48 | Orange-flanked<br>Bluetail | Tarsiger<br>cyanurus       | Passeriformes | Muscicapida<br>e   | Tarsiger     | winter visitor  | LC | NMP                   |
| 49 | Red-billed Blue Magpie     | Urocissa<br>erythroryncha  | Passeriformes | Corvidae           | Urocissa     | resident        | LC | NMP MMP<br>FCP        |
| 50 | Hwamei                     | Garrulax canorus           | Passeriformes | Leiothrichida<br>e | Garrulax     | resident        | LC | PP NMP MMP<br>FMP FCP |
| 51 | Yellow-bellied Prinia      | Prinia<br>flaviventris     | Passeriformes | Cisticolidae       | Cisticola    | resident        | LC | PP NMP MMP<br>FMP FCP |
| 52 | Yellow-bellied Tit         | Pardaliparus<br>venustus   | Passeriformes | Paridae            | Parus        | resident        | LC | PP NMP MMP<br>FCP     |
| 53 | Motacilla flava            | Motacilla flava            | Passeriformes | Motacillidae       | Motacilla    | winter visitor  | LC | MMP                   |
| 54 | Narcissus Flycatcher       | Narcissina<br>Flycatcher   | Passeriformes | Muscicapida<br>e   | Ficedula     | passing migrant | LC | PP MMP FCP            |
| 55 | Yellow-browed<br>Warbler   | Phylloscopus<br>inornatus  | Passeriformes | Phylloscopid<br>ae | Phylloscopus | winter visitor  | LC | PP NMP MMP<br>FMP FCP |
| 56 | Pallas's Leaf Warbler      | Phylloscopus<br>proregulus | Passeriformes | Phylloscopid<br>ae | Phylloscopus | winter visitor  | LC | PP NMP FMP<br>FCP     |
| 57 | Grey-chinned Minivet       | Pericrocotus<br>solaris    | Passeriformes | Passeriforme<br>s  | Pericrocotus | resident        | LC | PP MMP FMP<br>FCP     |
| 58 | Grey Wagtail               | Motacilla cinerea          | Passeriformes | Motacillidae       | Motacilla    | winter visitor  | LC | PP MMP FCP            |
| 59 | Grey Treepie               | Dendrocitta<br>formosae    | Passeriformes | Corvidae           | Dendrocitta  | resident        | LC | PP NMP MMP<br>FMP FCP |
| 60 | Black-faced Bunting        | Emberiza<br>spodocephala   | Passeriformes | Emberiza           | Emberiza     | summer visitor  | LC | MMP                   |
| 61 | Common Myna                | Acridotheres<br>tristis    | Passeriformes | Sturnidae          | Acridotheres | resident        | LC | NMP MMP<br>FMP FCP    |
| 62 | Barn Swallow               | Hirundo rustica            | Passeriformes | Hirundinidae       | Hirundo      | summer visitor  | LC | MMP FMP               |
| 63 | Red-rumped Swallow         | Cecropis daurica           | Passeriformes | Hirundinidae       | Cecropis     | resident        | LC | MMP                   |

|    |                               |                       |               |              |               |                |    |                       |
|----|-------------------------------|-----------------------|---------------|--------------|---------------|----------------|----|-----------------------|
| 64 | Blue Rock-thrush              | Monticola solitarius  | Passeriformes | Turdidae     | Monticola     | winter visitor | LC | FMP                   |
| 65 | Chestnut Bulbul               | Hemixos castanonotus  | Passeriformes | Pycnonotidae | Hypsipetes    | resident       | LC | PP NMP MMP<br>FCP     |
| 66 | Collared Finchbill            | Spizixos semitorques  | Passeriformes | Pycnonotidae | Spizixos      | resident       | LC | PP NMP MMP<br>FMP FCP |
| 67 | Mountain Bulbul               | Ixos mccllellandii    | Passeriformes | Pycnonotidae | Hypsipetes    | resident       | LC | NMP MMP<br>FMP FCP    |
| 68 | Tree Sparrow                  | Passer montanus       | Passeriformes | Passeridae   | Passer        | resident       | LC | PP NMP MMP<br>FMP FCP |
| 69 | Brownish-flanked Bush Warbler | Horornis fortipes     | Passeriformes | Cettiidae    | Cettia        | resident       | LC | PP MMP FMP<br>FCP     |
| 70 | Oriental Magpie Robin         | Copsychus saularis    | Passeriformes | Muscicapidae | Copsychus     | resident       | LC | PP NMP MMP<br>FMP FCP |
| 71 | Japanese Bush-Warbler         | Horornis diphone      | Passeriformes | Sylviidae    | Cettia        | winter visitor | LC | MMP                   |
| 72 | Forest Wagtail                | Dendronanthus indicus | Passeriformes | Motacillidae | Dendronanthus | winter visitor | LC | NMP MMP<br>FMP        |
| 73 | Russet Sparrow                | Passer rutilans       | Passeriformes | Passeridae   | Passer        | resident       | LC | NMP                   |
| 74 | Olive-backed Pipit            | Anthus hodgsoni       | Passeriformes | Motacillidae | Anthus        | winter visitor | LC | PP NMP MMP<br>FCP     |
| 75 | Common Blackbird              | Turdus merula         | Passeriformes | Turdidae     | Turdus        | resident       | LC | PP NMP MMP<br>FMP FCP |
| 76 | Oriental Skylark              | Alauda gulgula        | Passeriformes | Alaudidae    | Alauda        | resident       | LC | NMP                   |
| 77 | Japanese Tit                  | Parus minor           | Passeriformes | Paridae      | Parus         | resident       | LC | PP NMP MMP<br>FMP FCP |
| 78 | Manchurian Bush Warbler       | Horornis borealis     | Passeriformes | Cettiidae    | Cettia        | winter visitor | LC | PP NMP FMP<br>FCP     |
| 79 | Common Tailorbird             | Orthotomus sutorius   | Passeriformes | Sylviidae    | Orthotomus    | resident       | LC | NMP MMP<br>FMP FCP    |

|    |                                |                          |                 |              |              |                 |    |            |
|----|--------------------------------|--------------------------|-----------------|--------------|--------------|-----------------|----|------------|
| 80 | Scarlet-backed<br>Flowerpecker | Dicaeum<br>cruentatum    | Passeriformes   | Dicaeidae    | Dicaeum      | resident        | LC | FMP        |
| 81 | European Starling              | Sturnus vulgaris         | Passeriformes   | Sturnidae    | Sturnus      | passing migrant | LC | FCP        |
| 82 | Long-tailed Shrike             | Lanius schach            | Passeriformes   | Laniidae     | Lanius       | resident        | LC | PP NMP     |
| 83 | Vinous-throated<br>Parrotbill  | Sinosuthora<br>webbiana  | Passeriformes   | Sylviidae    | Paradoxornis | resident        | LC | PP MMP FCP |
| 84 | Little Egret                   | Egretta garzetta         | Pelecaniformes  | Ardeidae     | Egretta      | resident        | LC | PP NMP FMP |
| 85 | Chinese Pond Heron             | Ardeola bacchus          | Pelecaniformes  | Ardeidae     | Ardeola      | resident        | LC | PP         |
| 86 | Black-crowned Night<br>Heron   | Nycticorax<br>nycticorax | Pelecaniformes  | Ardeidae     | Ardeidae     | resident        | LC | PP FMP     |
| 87 | Crested Goshawk                | Accipiter<br>trivirgatus | Accipitriformes | Accipitridae | Accipiter    | resident        | LC | FMP        |
| 88 | Crested Serpent Eagle          | Spilornis cheela         | Accipitriformes | Accipitridae | Spilornis    | resident        | LC | FCP        |
| 89 | Azure-winged Magpie            | Cyanopica<br>cyanus      | Passeriformes   | Corvidae     | Cyanopica    | resident        | LC | PP FCP     |
| 90 | Blue Whistling Thrush          | Myophonus<br>caeruleus   | Passeriformes   | Muscicapidae | Myophonus    | resident        | LC | FCP FCP    |

---
